# Supplementary material
Source: Springer Nature journal article supplement (https://www.springermedizin.de/resource/supplementary/13014_2012_648_MOESM2_ESM.pdf/9633866)

BOOST

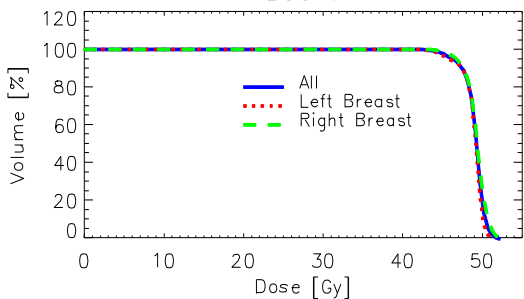

PTV-BOOST

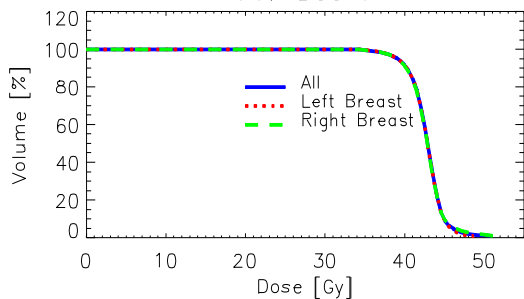

Ipsilateral lung

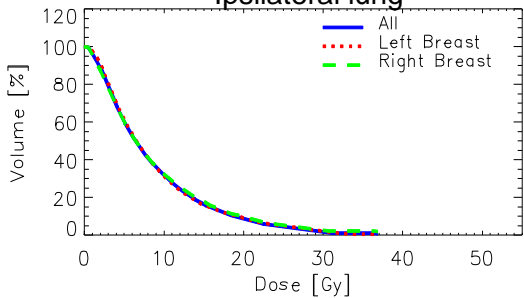

Contralateral lung

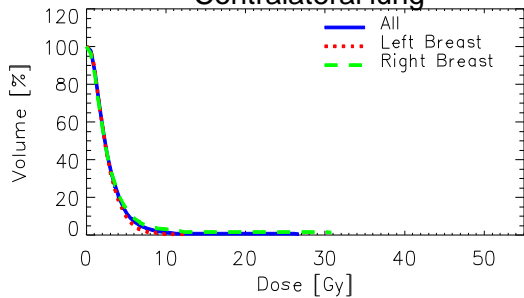

Heart

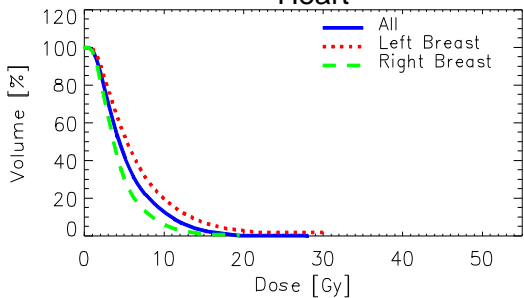

Contralateral breast

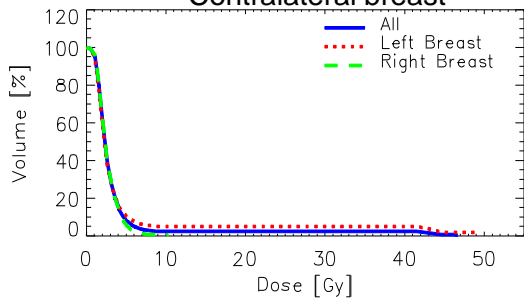

Skin 3 mm

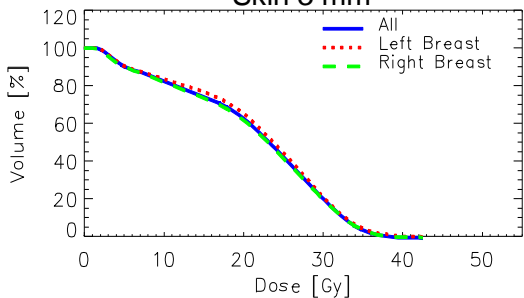

Skin 5 mm

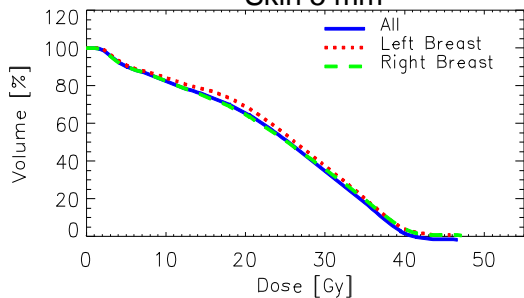

Ribs

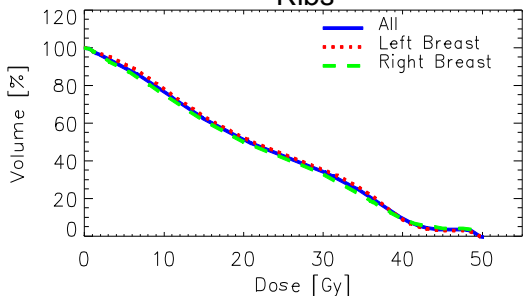

Healthy tissue

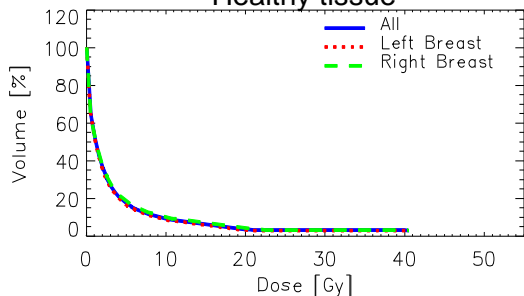

Supplement: MOESM2 [file 9633866]
